# Supplementary material for: TEX15 is an essential executor of MIWI2-directed transposon DNA methylation and silencing
Source: PubMed Central journal article supplement (PMC7385494; doi:10.1038/s41467-020-17372-5), 2020-07-27
Supplement: 41467_2020_17372_MOESM1_ESM.pdf [file 41467_2020_17372_MOESM1_ESM.pdf]

## Supplementary Information

### **TEX15 is an essential executor of MIWI2-directed transposon DNA methylation and silencing.**

Schöpp *et al.*

This document contains:

- Supplementary Figures 1–7
- Supplementary Tables 1–4

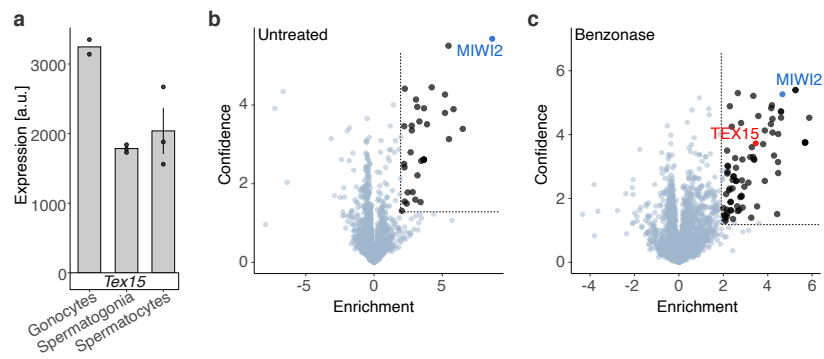

**Supplementary Figure 1 | *Tex15* is abundantly expressed in foetal gonocytes and co-precipitates with HA-MIWI2.**

**a**, Expression of *Tex15* in E16.5 gonocytes (n=2), adult spermatogonia (n=3) and Leptotene/Zygotene spermatocytes (n=3) measured by Affymetrix microarray. Data shows mean of expression in arbitrary units (a.u.) and s.e.m. **b**, **c**, Volcano plots showing enrichment ( $\log_2(\text{mean LFQ ratio of MIWI2-HA IP per control IP from } Miwi2^{+/+} \text{ foetal testis})$ ) over statistical confidence ( $-\log_{10}(P\text{-value of two-sided Student's } t\text{-test})$ ) of proteins co-immunoprecipitated with HA-MIWI2 from E16.5 testes lysates under hypotonic lysis conditions **b** without (n=3) and **c** with Benzonase treatment (n=4) respectively. The highlighted proteins indicate >4-fold enrichment and significance  $P < 0.05$ .

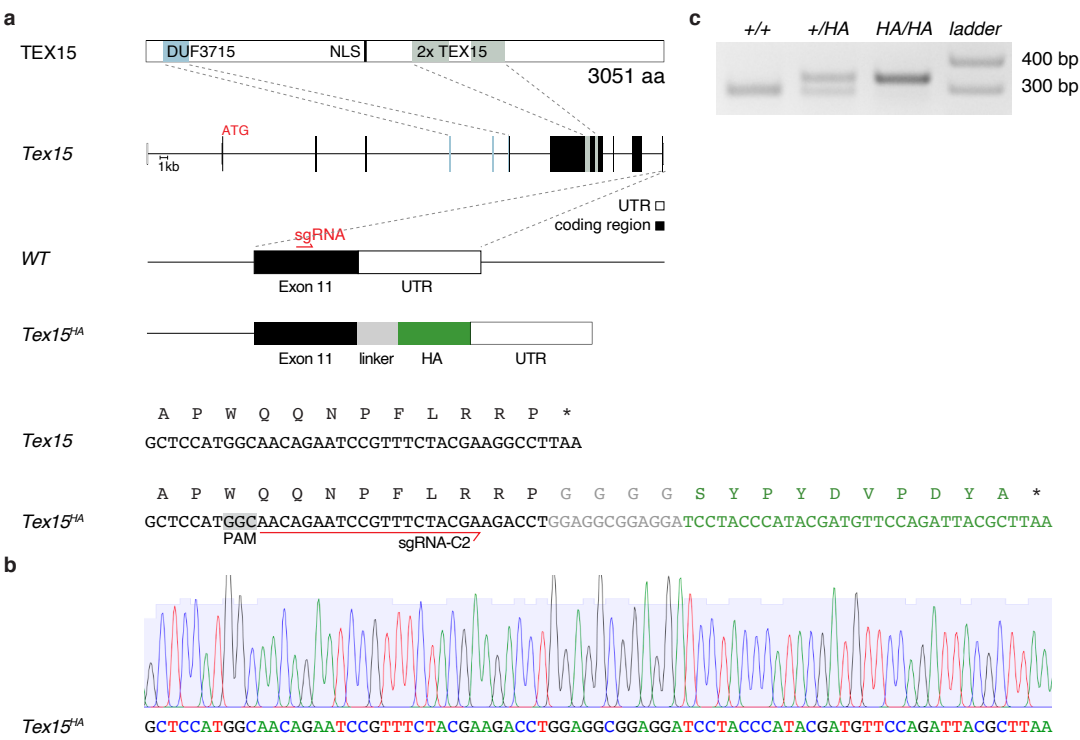

### Supplementary Figure 2 | Generation of the *Tex15<sup>HA</sup>* mouse allele.

**a**, Schematic representation of the TEX15 protein (transcript XM\_006508977.3) and the *Tex15* locus with design of sgRNA, recognizing a specific sequence within exon 11 close to the protein's C-terminus. The 42 bp insertion encoding for a 4x glycine linker followed by HA epitope tag highlighted in grey and green respectively. **b**, Sequencing trace of *Tex15* allele carrying the HA epitope tag. **c**, Representative image of genotyping results for *Tex15<sup>+/+</sup>*, *Tex15<sup>HA/+</sup>* and *Tex15<sup>HA/HA</sup>* animals.

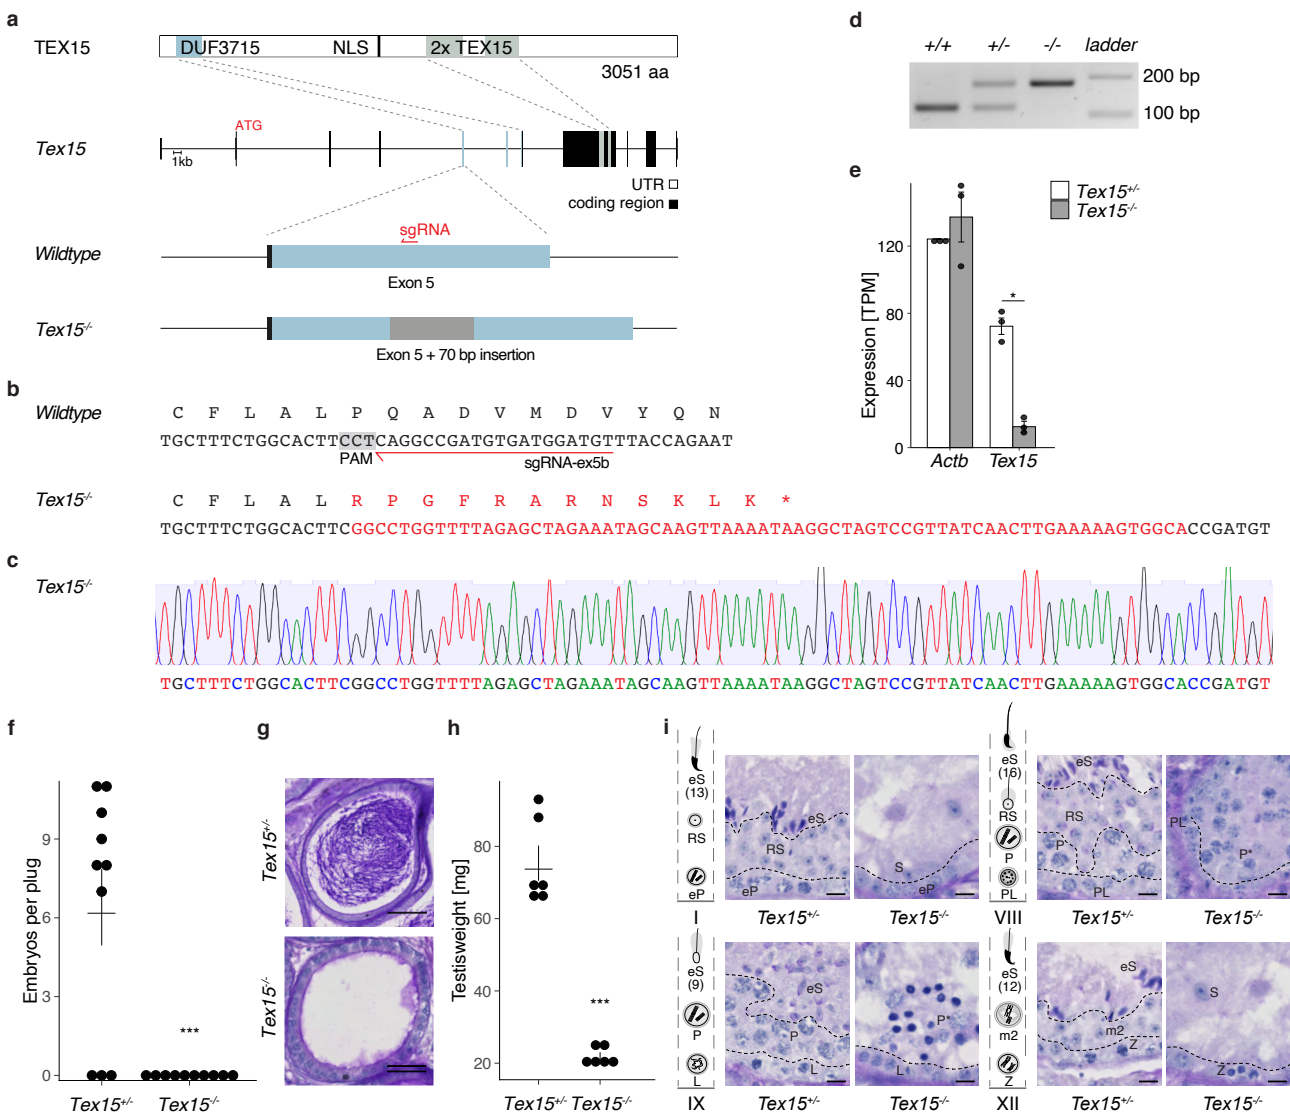

### Supplementary Figure 3 | Generation and analysis of the *Tex15*<sup>-/-</sup> allele.

**a**, Schematic representation of the TEX15 protein (transcript XM\_006508977.3) and the *Tex15* locus and exon 5 with 70 bp insertion. **b**, Design of a sgRNA recognizing a specific sequence within DUF3715 leading to frame shift and a premature stop codon. The 70 bp insertion is highlighted in red. **c**, Sequencing trace of the mutated part of *Tex15*. **d**, Representative image of genotyping results for *Tex15*<sup>+/+</sup>, *Tex15*<sup>+/-</sup> and *Tex15*<sup>-/-</sup> animals. **e**, RNA seq analysis of *Actb* and *Tex15* expression in transcripts per million (TPM) from E16.5 *Tex15*<sup>+/-</sup> and *Tex15*<sup>-/-</sup> gonocytes (n=3). Mean and s.e.m. indicated. \**P*<0.01, Bonferroni corrected two-sided Student's *t*-test. *Actb* *P*=0.85, *Tex15* *P*=0.001. **f**, E16.5 embryos per plug of *Wildtype* females mated with *Tex15*<sup>+/-</sup> (n=5) and *Tex15*<sup>-/-</sup> (n=4) studs respectively (10 plugs total for each genotype). Mean and s.e.m. indicated. \*\*\*, *P*<0.001, two-sided Student's *t*-test (*P*=0.00035). **g**, Representative images of epididymis section from adult *Tex15*<sup>+/-</sup> and *Tex15*<sup>-/-</sup> mice stained with PAS and Haematoxylin (n=3). Scale bar 10 μm. **h**, Testis weight from adult *Tex15*<sup>+/-</sup> and *Tex15*<sup>-/-</sup> mice measured in mg (n=3). Mean and s.e.m. indicated. \*\*\*, *P*<0.001, two-sided Student's *t*-test (*P*=8.283E-07). **i**, Detailed view of *Tex15*<sup>+/-</sup> and *Tex15*<sup>-/-</sup> adult testis section stained with PAS and Haematoxylin at different stages of spermatogenesis within seminiferous tubules. eP, early pachytene; RS, round spermatid; eS, elongated spermatid; S, Sertoli cell; P, pachytene; PL, preleptotene; L, leptotene; Z, zygotene; m2, diplotene (meiotic); P\*, failing/dying pachytene cell. Scale bar 5 μm.

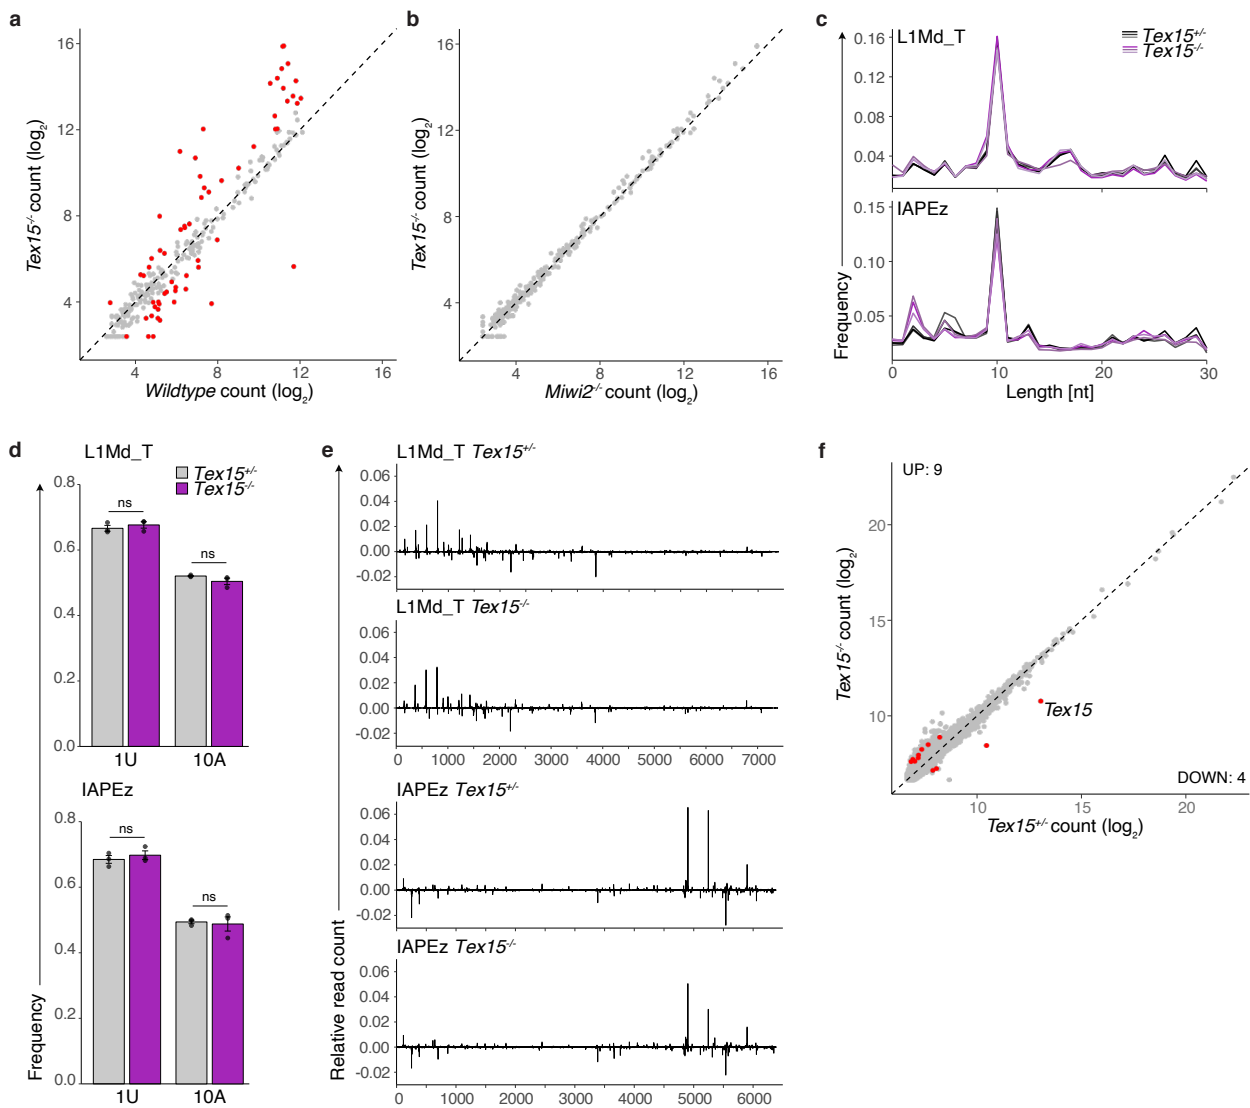

### Supplementary Figure 4 | Deletion of *Tex15* causes TE upregulation but does not influence piRNA biogenesis.

**a, b**, Data acquired from RNA seq of ( $n=3$ ) *Wildtype* and *Tex15*<sup>-/-</sup> P20 testes. **a**, Comparison of TE expression between *Wildtype* and *Tex15*<sup>-/-</sup> presented as read counts ( $\log_2$ ). TEs with significantly different change in expression are highlighted in red.  $P < 0.01$ , Benjamini-Hochberg adjusted two-sided Wald test,  $>2$ -fold change. **b**, Comparison of TE expression between *Tex15*<sup>-/-</sup> and *Miwi2*<sup>-/-</sup> mice presented as read counts ( $\log_2$ ). **c–e**, Analysis of small RNA sequenced piRNAs from *Tex15*<sup>+/-</sup> and *Tex15*<sup>-/-</sup> E16.5 testes ( $n=3$ ). **c**, Ping-pong analysis of piRNAs. Relative frequency of 5' end distance in nt between complementary piRNAs annotated to TE elements L1Md\_T and IAPEz. **d**, piRNA nucleotide features. Relative amount of piRNAs annotated to TE elements L1Md\_A and IAPEz with uracil at position 1 (1U) and adenine at position 10 (10A). Data represents mean ( $n=3$ ) and s.e.m. ns, not significant  $P=1$ , two-sided *t*-test, Bonferroni adjusted. **e**, Relative read count of piRNAs annotated to L1Md\_T and IAPEz, positive and negative values representing sense and antisense piRNAs respectively, plotted against position of consensus sequence. **f**, RNA seq analysis of gene expression in E16.5 *Tex15*<sup>+/-</sup> and *Tex15*<sup>-/-</sup> gonocytes ( $n=3$ ), up- or down-regulated genes are highlighted in red.  $P < 0.01$ , Benjamini-Hochberg adjusted two-sided Wald test,  $>2$ -fold change.

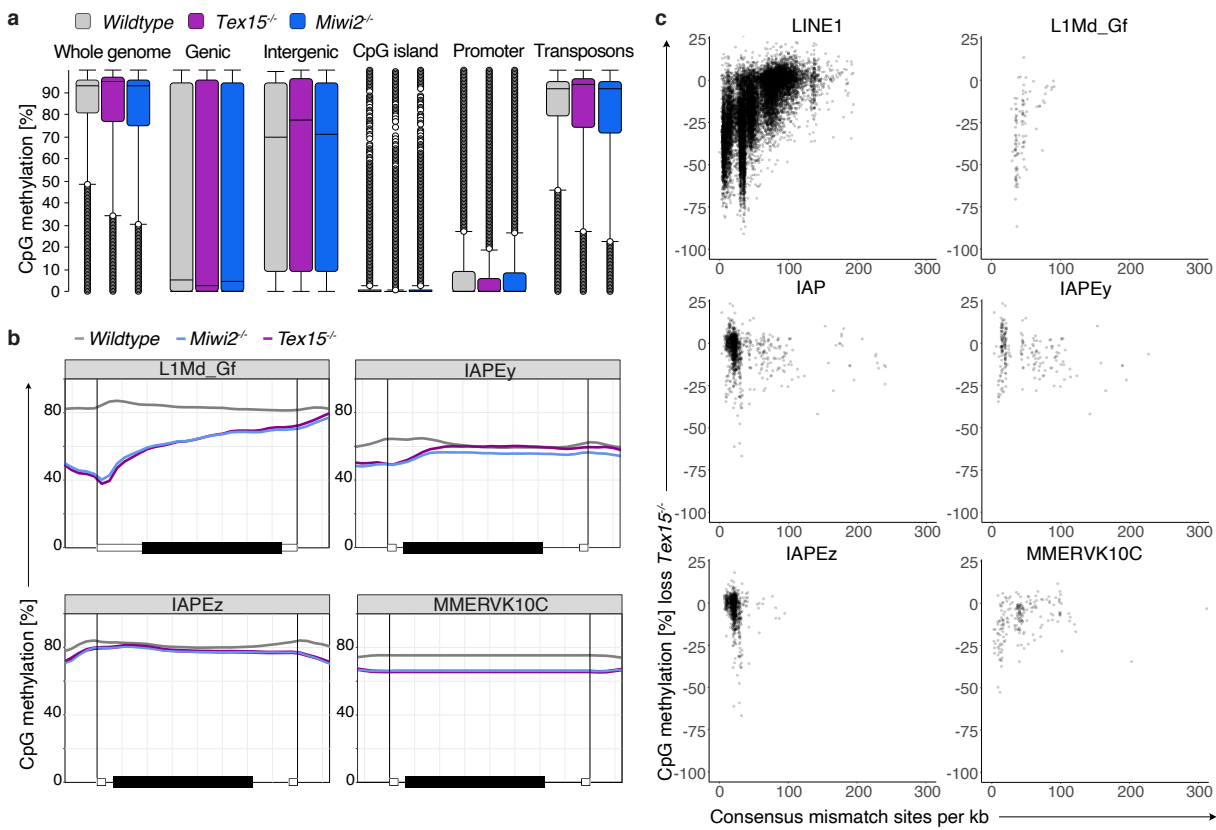

**Supplementary Figure 5 | *Tex15* deficiency CpG methylation loss is restricted to young transposable elements.**

**a–c**, Genomic CpG methylation analysis (P14 undifferentiated spermatogonia) in *Wildtype*, *Tex15*<sup>-/-</sup> and *Miwi2*<sup>-/-</sup> (n=3). **a**, CpG methylation percentage of genomic features genic, promoter and CpG islands and TEs (non-overlapping and intergenic non-overlapping TEs or genes). Box range indicates 25<sup>th</sup> to 75<sup>th</sup> percentile (interquartile range), line the median, whiskers range of median  $\pm 2$  interquartile range, dots datapoints outside this range. **b**, Metaplots showing mean CpG methylation over L1Md\_Gf, IAPEy, IAPEz, MMERVK10C and adjacent 2 kb. **c**, CpG methylation loss in *Tex15*<sup>-/-</sup> relative to *Wildtype* plotted against divergence from consensus sequence.

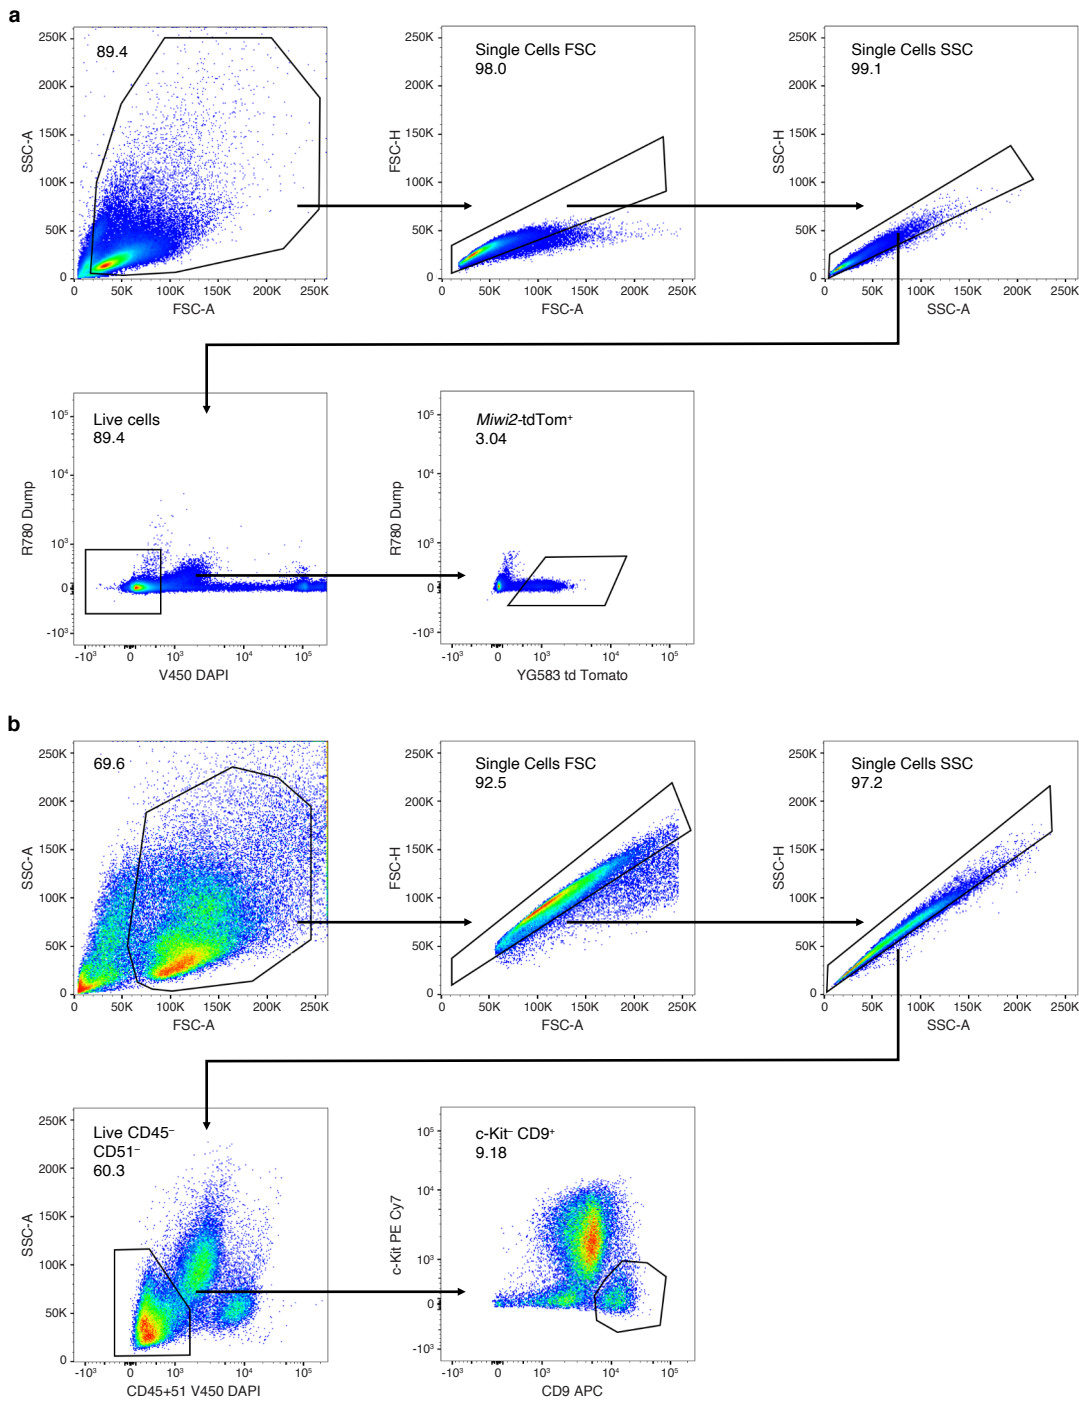

### Supplementary Figure 6 | FACS sorting gating strategy.

**a**, Representative example of gating strategy for FACS isolation of E16.5 gonocytes using the *Miwi2*<sup>tdTOM</sup> reporter allele. Live, *Miwi2*-tdTomato<sup>+</sup> gonocytes from E16.5 testicular single-cell suspension was stained with DAPI. A representative experiment of n=3 mice is shown. **b**, Representative example of gating strategy for FACS isolation of P14 undifferentiated spermatogonia. Gates select live, CD45<sup>-</sup> CD51<sup>-</sup>, c-Kit<sup>-</sup> CD9<sup>+</sup> undifferentiated spermatogonia obtained from single-cell suspension of testicular cells stained with anti-CD45 biotin, anti-CD51 biotin, anti-c-Kit PE-Cy7 and anti-CD9 APC antibodies as well as streptavidin V450 and DAPI. Representative experiment of n=3 mice is shown.

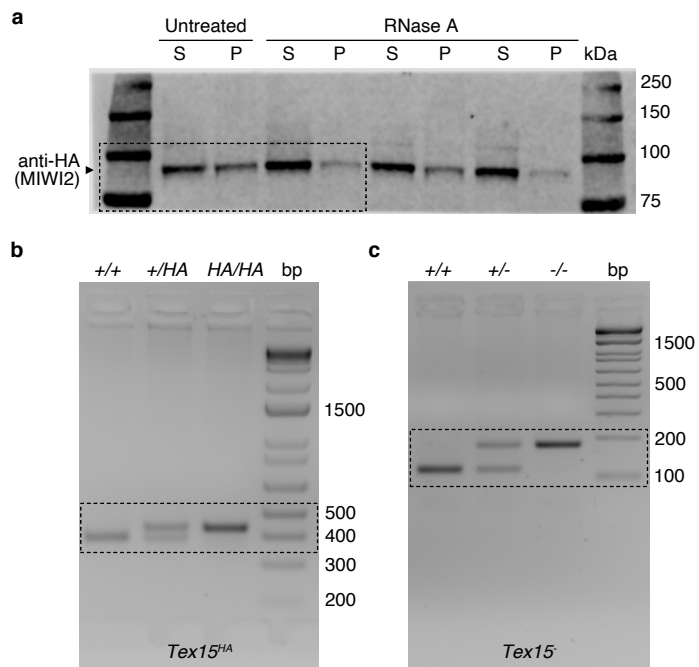

**Supplementary Figure 7 | Uncropped original blot and gel scans.**

**a**, Uncropped western blot image from Figure 1b. **b**, **c**, Uncropped gel images from **b** Supplementary Figure 2c and **c** Supplementary Figure 3d.



| Protein.ID | Protein | Gene           | pvalue  | Enrichment |
|------------|---------|----------------|---------|------------|
| Q8CGT6     | MIWI2   | <i>Piwil4</i>  | 6.1E-06 | 7447.0     |
| Q91XW8     | FKBP6   | <i>Fkbp6</i>   | 6.4E-04 | 122.3      |
| D3YUE6     | GTSF1   | <i>Gtsf1</i>   | 5.1E-04 | 43.8       |
| Q3U7K7     | TRIM21  | <i>Trim21</i>  | 1.6E-04 | 38.7       |
| Q5SUE7     | ADAD1   | <i>Adad1</i>   | 5.0E-03 | 12.0       |
| Q8CAE2     | HENMT1  | <i>Henmt1</i>  | 2.1E-03 | 9.0        |
| Q5U4C1     | GASP1   | <i>Gprasp1</i> | 9.3E-05 | 8.9        |
| Q5VCS6     | TDRD5   | <i>Tdrd5</i>   | 9.6E-04 | 8.6        |
| D3YWG8     | MOV10L1 | <i>Mov10l1</i> | 1.1E-04 | 8.6        |
| Q14BI7     | TDRD9   | <i>Tdrd9</i>   | 2.5E-02 | 5.4        |

**Supplementary Table 1 | Proteins identified as MIWI2 interactors without RNase treatment**

Table lists all statistically significant identified proteins with at least 4-fold enrichment in the HA-MIWI2 immunoprecipitation without RNase A treatment.  $P < 0.05$ , two-sided Student's *t*-test.

| Protein.ID | Protein          | Gene            | pvalue  | Enrichment |
|------------|------------------|-----------------|---------|------------|
| Q8CGT6     | MIWI2            | <i>Piwil4</i>   | 1.6E-04 | 14532.5    |
| D3YUE6     | GTSF1            | <i>Gtsf1</i>    | 2.3E-03 | 306.0      |
| Q5SUE7     | ADAD1            | <i>Adad1</i>    | 8.3E-04 | 158.6      |
| Q5VCS6     | TDRD5            | <i>Tdrd5</i>    | 1.4E-03 | 114.6      |
| Q91XW8     | FKBP6            | <i>Fkbp6</i>    | 5.5E-04 | 84.1       |
| Q14BI7     | TDRD9            | <i>Tdrd9</i>    | 2.2E-03 | 67.2       |
| Q80Y52     | HSP90AA1         | <i>Hsp90aa1</i> | 3.2E-02 | 41.5       |
| Q61699     | HSPH1            | <i>Hsph1</i>    | 1.8E-03 | 35.1       |
| Q3TJG6     | PTGES3           | <i>Ptges3</i>   | 4.7E-03 | 30.6       |
| Q5U4C1     | GASP1            | <i>Gprasp1</i>  | 4.0E-04 | 28.0       |
| Q3U7K7     | TRIM21           | <i>Trim21</i>   | 9.9E-03 | 17.6       |
| Q8BVN9     | MAELSTROM        | <i>Mael</i>     | 1.2E-02 | 16.4       |
| F8VPN2     | TEX15            | <i>Tex15</i>    | 1.5E-02 | 13.7       |
| Q99MV7     | RNF17            | <i>Rnf17</i>    | 1.7E-03 | 13.3       |
| Q3TX38     | VDAC3            | <i>Vdac3</i>    | 1.4E-02 | 11.7       |
| Q9Z2X1     | HNRNPF           | <i>Hnrnpf</i>   | 2.9E-02 | 11.1       |
| Q8CAE2     | HENMT1           | <i>Henmt1</i>   | 8.1E-03 | 10.5       |
| Q4FJN2     | FKBP5            | <i>Fkbp5</i>    | 1.4E-02 | 8.5        |
| P38647     | HSP9             | <i>Hsp9</i>     | 5.5E-03 | 8.2        |
| Q3U1J4     | DDB1             | <i>Ddb1</i>     | 5.1E-03 | 7.7        |
| Q8BP92     | RETICULOCALBIN-2 | <i>Rcb2</i>     | 2.7E-02 | 7.4        |
| Q6P3E7     | HDAC10           | <i>Hdac10</i>   | 2.4E-02 | 7.2        |
| Q3TXV1     | PSMD2            | <i>Psm2</i>     | 1.0E-02 | 7.2        |
| E9QNN1     | DHX9             | <i>Dhx9</i>     | 4.3E-03 | 6.8        |
| Q8CDG1     | MILI             | <i>Piwil2</i>   | 2.6E-02 | 6.6        |
| Q71LX8     | HSP90AB1         | <i>Hsp90ab1</i> | 2.1E-03 | 6.3        |
| B1ASB6     | SPOCD1           | <i>Spocd1</i>   | 4.3E-03 | 6.1        |
| H3BKT1     | C19orf84 homolog | <i>Gm38999</i>  | 1.2E-02 | 6.0        |
| B2RQL4     | ADAD2            | <i>Adad2</i>    | 2.9E-02 | 5.5        |
| P63017     | HSPA8            | <i>Hspa8</i>    | 2.2E-03 | 5.0        |
| Q9EQI8     | MRPL46           | <i>Mrpl46</i>   | 1.6E-02 | 4.6        |

### Supplementary Table 2 | Proteins identified as MIWI2 interactors upon RNase treatment

Table lists all statistically significant identified proteins with at least 4-fold enrichment in the HA-MIWI2 immunoprecipitation with RNase A treatment.  $P < 0.05$ , two-sided Student's *t*-test.

| TE              | pvalue      | Fold-Change  |
|-----------------|-------------|--------------|
| IAPA_MM         | 1.46E-156   | 5.041102846  |
| L1Md_Gf_5end    | 1.17E-217   | 4.831110005  |
| L1MdTf_II       | <2E-324     | 4.719267306  |
| L1MdTf_I        | <2E-324     | 4.68459579   |
| RLTR1IAP_MM     | 1.81E-157   | 3.89034751   |
| L1MdA_I         | 3.55E-180   | 3.741926829  |
| IAPEZI          | 1.04E-149   | 3.658763136  |
| L1_MM           | 3.61E-158   | 3.621005321  |
| MMERVK10C       | 2.72E-41    | 3.507031233  |
| GSAT_MM         | 7.22E-25    | 3.292712845  |
| IAPLTR1_Mm      | 7.68E-86    | 2.790532611  |
| L1MdA_II        | 9.15E-102   | 2.758789976  |
| IAPLTR1a_I_MM   | 1.59E-103   | 2.477258235  |
| IAPEY5_I        | 6.76E-17    | 2.043293151  |
| L1MdA_III       | 4.90E-58    | 1.958255321  |
| L1MdTf_III      | 2.65E-05    | 1.916693679  |
| L1MdGf_II       | 3.03E-53    | 1.879089312  |
| IAP5-Mm_I       | 7.21E-31    | 1.732717725  |
| SRV_MM-int      | 1.74E-07    | 1.618365494  |
| IAPEYI          | 1.54E-18    | 1.607588348  |
| RLTR46B         | 0.001239597 | 1.536346236  |
| ERVB4_1-I_MM    | 4.05E-22    | 1.499804339  |
| MMERGLN_I       | 1.03E-26    | 1.498855362  |
| ERVB4_1B-I_MM   | 2.00E-12    | 1.465952283  |
| MMERGLN_LTR     | 4.62E-07    | 1.452706061  |
| MMVL30          | 1.06E-10    | 1.386165899  |
| IAP5-Mm_LTR     | 0.001654352 | 1.318381681  |
| RLTR25_MM       | 2.57E-12    | 1.299411918  |
| ERVB4_3-I_MM    | 0.00592821  | 1.278398314  |
| IAPLTR2_Mm      | 3.83E-10    | 1.257048972  |
| ERVB4_1B-LTR_MM | 6.04E-09    | 1.243593745  |
| L1MdGf_I        | 4.49E-35    | 1.239962832  |
| IAPEY4_I        | 1.70E-07    | 1.197267541  |
| IAPEY4_LTR      | 5.10E-07    | 1.179967112  |
| RLTR10B2        | 4.84E-06    | 1.088990604  |
| ERV1-4_MM-LTR   | 0.000851454 | 1.048683221  |
| L1MdA_IV        | 2.97E-18    | 1.019643936  |
| B2_Mm1a         | 2.59E-14    | 1.018149183  |
| ERVB4_2B-LTR_MM | 0.002498859 | -1.062756079 |
| ERVB4_2-I_MM    | 8.23E-10    | -1.145276136 |
| RLTR13B2        | 7.83E-08    | -1.248428089 |
| RLTR19B_MM      | 0.001418549 | -1.423584073 |
| RLTR10D2        | 0.00101929  | -1.429788906 |
| RLTR13D2        | 1.50E-06    | -1.500499825 |
| RMER17B2        | 4.16E-06    | -1.630125251 |
| MERV1_I         | 1.06E-10    | -1.656122187 |
| RLTR43C         | 0.000701683 | -1.795039358 |
| RLTR9D          | 5.10E-07    | -1.86330312  |
| RMER2           | 0.000171046 | -1.991702086 |
| LTRIS5          | 0.00062669  | -2.014260217 |
| IAPEY3_LTR      | 7.78E-12    | -2.379120854 |
| RLTR50B         | 8.84E-05    | -2.426436473 |
| RLTR9D2         | 3.35E-09    | -2.742050006 |
| ERVB7_3-LTR_MM  | 0.000225873 | -2.759801837 |
| RLTR41A2        | 0.001666553 | -2.821558008 |
| RLTR1F_Mm       | 7.24E-06    | -3.666559464 |
| RLTR41B         | 4.23E-06    | -4.180078225 |
| IAPLTR3         | 5.73E-33    | -4.830905124 |
| RLTR30B_MM      | 5.88E-06    | -6.208325728 |
| IAPLTR3_I       | 1.20E-97    | -6.322743634 |
| RLTR9A2         | 2.40E-06    | -6.553159691 |

**Supplementary Table 3 | Deregulated TEs in *Tex15<sup>-/-</sup>* testes at P20**

Table lists all statistically significantly deregulated TEs in *Tex15<sup>-/-</sup>* animals compared to *Wildtype* identified by RNA seq in P20 testes.  $P < 0.01$ , Benjamini-Hochberg adjusted two-sided Wald test, >2-fold change.

| Ensemble           | Gene Name | pvalue      | Fold-Change  |
|--------------------|-----------|-------------|--------------|
| Up-regulated       |           |             |              |
| ENSMUSG00000027435 | Cd93      | 7.30E-06    | 4.359319993  |
| ENSMUSG00000026712 | Mrc1      | 2.22E-06    | 2.668664142  |
| ENSMUSG00000050079 | Rspry1    | 2.22E-06    | 1.189224869  |
| ENSMUSG00000036617 | Etl4      | 0.000139745 | 2.019792755  |
| ENSMUSG00000055435 | Maf       | 0.000139745 | 5.332570952  |
| ENSMUSG00000070462 | Tlnrd1    | 0.000139745 | 3.9182001    |
| ENSMUSG00000074743 | Thbd      | 0.000139745 | 2.808271472  |
| ENSMUSG00000031245 | Hmgn5     | 0.004880105 | 2.541229877  |
| ENSMUSG00000039706 | Ldb2      | 0.006580283 | 3.170161606  |
| Down-regulated     |           |             |              |
| ENSMUSG00000009628 | Tex15     | 6.88E-08    | -2.338311102 |
| ENSMUSG00000075015 | Gm10801   | 2.22E-06    | -2.491763953 |
| ENSMUSG00000075014 | Gm10800   | 2.98E-05    | -2.674913904 |
| ENSMUSG00000095280 | Gm21738   | 0.000139745 | -2.613879571 |

#### Supplementary Table 4 | Deregulated genes in *Tex15*<sup>-/-</sup> gonocytes at E16.5

Table lists all statistically significantly up- or down-regulated genes respectively in E16.5 *Tex15*<sup>-/-</sup> gonocytes compared to *Tex15*<sup>+/-</sup> control.  $P < 0.01$ , Benjamini-Hochberg adjusted two-sided Wald test, >2-fold change.
